# Supplementary material for: Defective NADPH production in mitochondrial disease complex I causes inflammation and cell death
Source: PubMed Central journal article supplement (PMC7264245; doi:10.1038/s41467-020-16423-1), 2020-06-01
Supplement: 41467_2020_16423_MOESM3_ESM.pdf [file 41467_2020_16423_MOESM3_ESM.pdf]

## Description of Additional Supplementary Files

**File Name:** Supplementary Data 1.

**Description:** Supplementary Figures related to the manuscript as well as their corresponding legends and uncropped original scans.

**File Name:** Supplementary Data 2.

**Description:** Metabolomics analysis of Control and ND1 mutant cells.

**File Name:** Supplementary Data 3.

**Description:** Metabolomics analysis in brain samples of WT and Ndufs4 KO mice.

**File Name:** Supplementary Data 4.

**Description:** Proteomics analysis of Control U2OS cells cultured in glucose or Galactose conditions.
